# Supplementary material
Source: publisher figshare collection journal article supplement (https://acs.figshare.com/ndownloader/files/4240951)
Supplement: Supplementary file 1 [file 4240951]

# Supporting Information

## Photocatalytically-Reduced Graphite Oxide Electrode for Electrochemical Capacitors

Hsin-Chieh Huang,<sup>1</sup> Cheng-Wei Huang,<sup>1</sup> Chien-Te Hsieh,<sup>2</sup> Ping-Lin Kuo,<sup>1</sup>

Jyh-Ming Ting,<sup>3</sup> and Hsisheng Teng<sup>1,4,\*</sup>

<sup>1</sup>Department of Chemical Engineering and Research Center for Energy  
Technology and Strategy, National Cheng Kung University, Tainan 70101, Taiwan

<sup>2</sup>Department of Chemical Engineering and Materials Science, Yuan Ze Fuel Cell  
Center, Yuan Ze University, Taoyuan 32023, Taiwan

<sup>3</sup>Department of Materials Science and Engineering, National Cheng Kung  
University, Tainan 70101, Taiwan

<sup>4</sup>Center for Micro/Nano Science and Technology, National Cheng Kung  
University, Tainan 70101, Taiwan

\*To whom correspondence should be addressed. E-mail: [hteng@mail.ncku.edu.tw](mailto:hteng@mail.ncku.edu.tw), Tel:  
886-6-2385371, Fax:886-6-2344496

- 1. Raman spectra of the GO, irr-GO4, and irr-GO8 specimens**
- 2. Ragone plots for the cells assembled with irr-GO specimens of 2–10 h light irradiation**

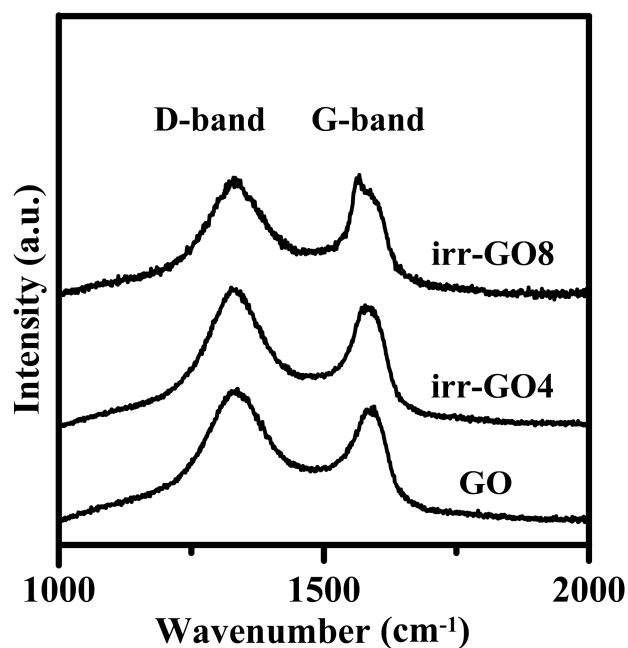

**Figure S1.** Raman spectra of the GO, irr-GO4, and irr-GO8 specimens. All the specimens show well-defined D- and G-band peaks in the spectra. The intensity ratios of the D- to G-band of the GO, irr-GO4, and irr-GO8 specimens were 1.11, 1.08, and 0.99, respectively, indicating that the irradiation results in oxygen removal and formation of  $sp^2$  orbitals on the basal plane.

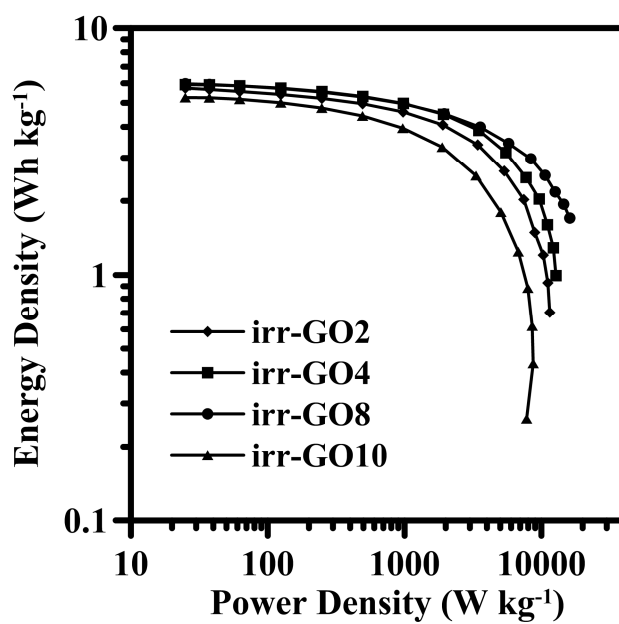

**Figure S2.** Ragone plots of the symmetric cells assembled with irr-GO specimens from 2–10 h light irradiation. The electrochemical measurements were conducted in 2 M H<sub>2</sub>SO<sub>4</sub> with a potential window of 1 V.
